# Supplementary material
Source: PubMed Central journal article supplement (PMC3811468)
Supplement: AAC.00825-13_zac010132176so1.pdf [file AAC.00825-13_zac010132176so1.pdf]

Figure 1S. Intracellular expression of LL37 causes bactericidal effect on *E. coli* TOP10 strain. *E. coli* TOP10 cells that carried pHERD30T-LL37 was treated with L-arabinose at different growth stages, OD=0.012 (■), OD=0.536 (◆) OD=1.425(×) and control (●). Arrows indicate the beginning of the addition of L-arabinose. The experiment was repeated three times with similar results.

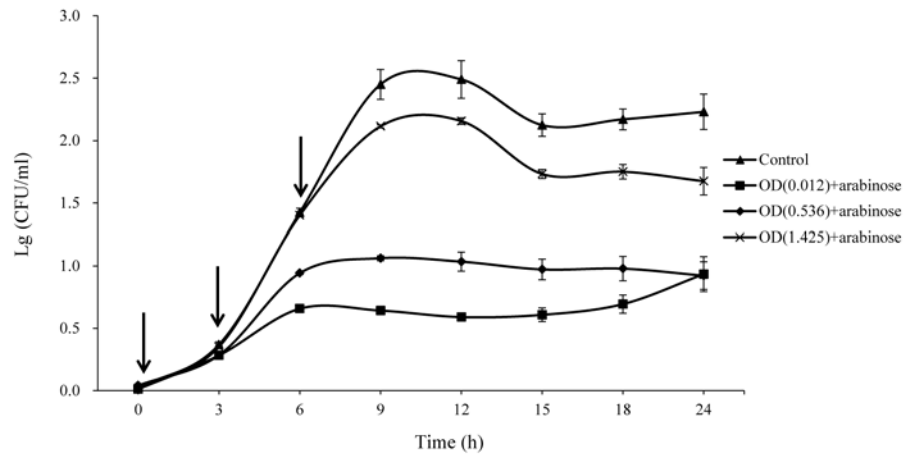



Figure S2. Cell morphology of *E.coli* after intracellular induction of LL-37 expression under aerobic growth condition. Cell membranes were stained with FM 4-64 and visualized in *E.coli* containing the empty plasmid (A), in the control cell (B) and cell after intracellular expression LL37 for 3 hours (C).

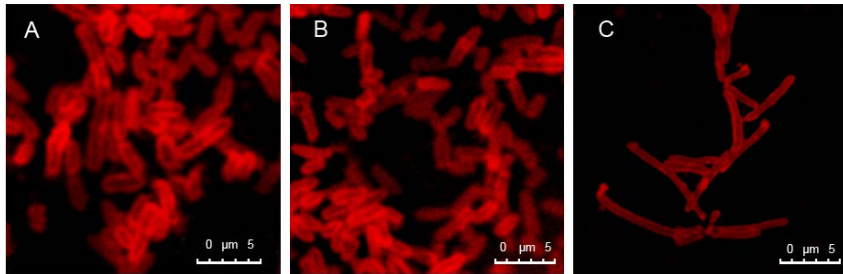

Figure S3. Comparison of genes expression data in *E. coli* TOP10 under aerobic and anaerobic conditions after intracellular expression of LL-37. The numbers of common genes are shown in the Venn diagram. Red or blue arrows indicate the up- or down-regulated genes.

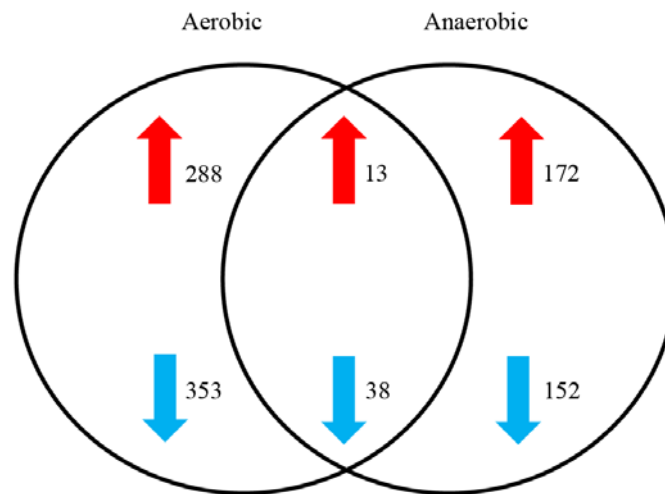

Figure S4. The morphology of *E.coli* when exogenous LL-37 were added into LB medium during bacterial growth.

A

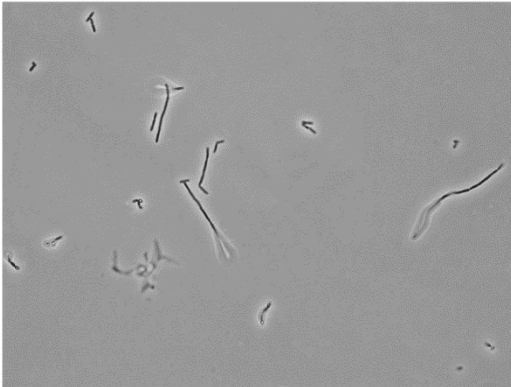

B

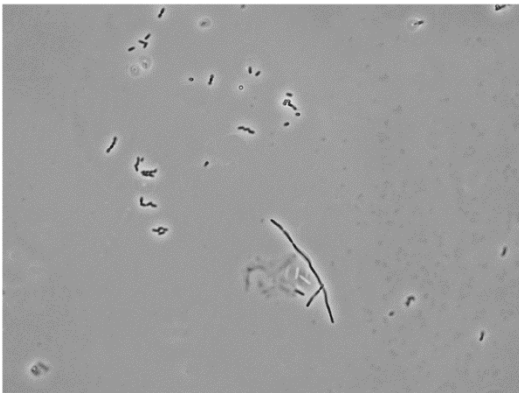

Table S1 Functional classification of the identified genes in *E. coli* based on the Clusters of Orthologous Groups of proteins (COGs) annotation at NCBI ([www.ncbi.nlm.nih.gov/COG](http://www.ncbi.nlm.nih.gov/COG)). The functional category codes are as follows: C, energy production and conversion; D, Cell cycle control, cell division, chromosome partitioning; E, amino acid transport and metabolism; F, nucleotide transport and metabolism; G, carbohydrate transport and metabolism; H, coenzyme transport and metabolism; I, lipid transport and metabolism; J, Translation, ribosomal structure and biogenesis; K, transcription; L, replication, recombination and repair; M, cell wall/membrane biogenesis; N, cell motility; O, posttranslational modification, protein turnover, chaperones; P, inorganic ion transport and metabolism; Q, secondary metabolites biosynthesis, transport and catabolism; R, general function prediction only; S, function unknown; T, signal transduction mechanisms; U, defense mechanisms; V, Intracellular trafficking, secretion, and vesicular transport –, not in COGs.

| COG | Aerobic      |       |                 |       | Anaerobic     |       |                 |       | Common genes regulated |       |                 |       | Total COG number |
|-----|--------------|-------|-----------------|-------|---------------|-------|-----------------|-------|------------------------|-------|-----------------|-------|------------------|
|     | UP-regulated | Rate  | Down- regulated | Rate  | Up- regulated | Rate  | Down- regulated | Rate  | Up- regulated          | Rate  | Down- regulated | Rate  |                  |
| -   | 70           | 0.090 | 44              | 0.056 | 37            | 0.047 | 17              | 0.022 | 2                      | 0.003 | 5               | 0.006 | 779              |
| A   | 0            | 0.000 | 1               | 0.500 | 0             | 0.000 | 0               | 0.000 | 0                      | 0.000 | 0               | 0.000 | 2                |
| C   | 15           | 0.160 | 54              | 0.189 | 8             | 0.028 | 16              | 0.056 | 0                      | 0.000 | 5               | 0.018 | 285              |
| D   | 1            | 0.029 | 3               | 0.086 | 0             | 0.000 | 0               | 0.000 | 0                      | 0.000 | 0               | 0.000 | 35               |
| E   | 26           | 0.074 | 43              | 0.123 | 10            | 0.028 | 9               | 0.026 | 0                      | 0.000 | 2               | 0.006 | 351              |
| F   | 4            | 0.043 | 9               | 0.096 | 3             | 0.032 | 4               | 0.043 | 0                      | 0.000 | 0               | 0.000 | 94               |
| G   | 17           | 0.049 | 55              | 0.157 | 16            | 0.046 | 20              | 0.057 | 1                      | 0.003 | 8               | 0.023 | 350              |
| H   | 5            | 0.032 | 2               | 0.013 | 3             | 0.019 | 5               | 0.032 | 0                      | 0.000 | 0               | 0.000 | 157              |
| I   | 3            | 0.031 | 18              | 0.186 | 5             | 0.052 | 1               | 0.010 | 0                      | 0.000 | 0               | 0.000 | 97               |
| J   | 8            | 0.043 | 9               | 0.049 | 5             | 0.027 | 7               | 0.038 | 0                      | 0.000 | 0               | 0.000 | 184              |
| K   | 40           | 0.132 | 12              | 0.040 | 20            | 0.066 | 19              | 0.063 | 0                      | 0.000 | 3               | 0.010 | 302              |
| L   | 35           | 0.167 | 8               | 0.038 | 9             | 0.043 | 9               | 0.043 | 0                      | 0.000 | 2               | 0.010 | 209              |
| M   | 11           | 0.046 | 15              | 0.063 | 7             | 0.029 | 8               | 0.033 | 1                      | 0.004 | 2               | 0.008 | 239              |
| N   | 19           | 0.183 | 2               | 0.019 | 5             | 0.048 | 6               | 0.058 | 0                      | 0.000 | 0               | 0.000 | 104              |
| O   | 28           | 0.192 | 17              | 0.116 | 5             | 0.034 | 10              | 0.068 | 1                      | 0.007 | 0               | 0.000 | 146              |
| P   | 30           | 0.136 | 17              | 0.077 | 6             | 0.027 | 12              | 0.054 | 0                      | 0.000 | 3               | 0.014 | 221              |
| Q   | 4            | 0.058 | 7               | 0.101 | 2             | 0.029 | 3               | 0.043 | 0                      | 0.000 | 1               | 0.014 | 69               |
| R   | 27           | 0.068 | 44              | 0.110 | 18            | 0.045 | 20              | 0.050 | 2                      | 0.005 | 6               | 0.015 | 399              |

|   |    |       |    |       |    |       |    |       |   |       |   |       |     |
|---|----|-------|----|-------|----|-------|----|-------|---|-------|---|-------|-----|
| S | 32 | 0.102 | 41 | 0.131 | 20 | 0.064 | 23 | 0.073 | 1 | 0.003 | 4 | 0.013 | 314 |
| T | 16 | 0.091 | 7  | 0.040 | 7  | 0.040 | 8  | 0.045 | 2 | 0.011 | 1 | 0.006 | 176 |
| U | 2  | 0.016 | 15 | 0.116 | 8  | 0.062 | 6  | 0.047 | 1 | 0.008 | 0 | 0.000 | 129 |
| V | 6  | 0.146 | 0  | 0.000 | 2  | 0.049 | 0  | 0.000 | 1 | 0.024 | 0 | 0.000 | 41  |

---
